# Supplementary material
Source: publisher figshare collection journal article supplement (https://acs.figshare.com/ndownloader/files/28358563)
Supplement: Supplementary file 1 [file 28358563]

## Sheet: Sheet2
Supporting Information
Unraveling the Role of Linker Design in Proteolysis Targeting Chimeras
Troy A. Bemis, † James J. La Clair† and Michael D. Burkart†,*
†Department of Chemistry and Biochemistry, University of California San Diego, 9500 Gilman Drive, La Jolla, California 92093–0358, United States
Sheet 1 - Tabulated linker length SAR data and normalization used to generate figure 6.

## Sheet: Sheet1
DOI	E3 Ligase C = CRBN, V = VHL	Compound number in original manuscript	Linker type A = aliphatic, P = PEG or other oxygen containing	Number of atoms in the linker	DC50 (nM)	Cell Line	Normalized linker length	Normalized DC50 (nM)	Method	Targets	NOTES
											###3000 nM was used as maximum upper limit in this presentation of data
https://doi.org/10.1021/acsmedchemlett.0c00046	V	3j	A	25	7.1	MM1S	0	0	in-cell ELISA	HDAC6
	V	3K	A	26	11		1	3.9	in-cell ELISA
https://doi.org/10.1021/acs.jmedchem.0c00339	C	11a	P	13		SRD15	-9	3000	Semi-quant immunoblotting	HMGCR	>3000 nm
	C	11b	P	14			-8	3000	Semi-quant immunoblotting		>3000 nm
	C	11c	P	15	3000		-7	2900	Semi-quant immunoblotting
	C	11d	P	16			-6	3000	Semi-quant immunoblotting		>3000 nm
	C	11e	P	17			-5	3000	Semi-quant immunoblotting		>3000 nm
	C	11f	P	18			-4	3000	Semi-quant immunoblotting		>3000 nm
	C	11g	P	19			-3	3000	Semi-quant immunoblotting		>3000 nm
	C	11h	P	20			-2	3000	Semi-quant immunoblotting		>3000 nm
	C	11i	P	21	1800		-1	1700	Semi-quant immunoblotting
	C	11j	P	22	100		0	0	Semi-quant immunoblotting
	C	11k	P	22					Semi-quant immunoblotting		NEG. Control. Methylated glutarimide
	C	11l	P	23	400		1	300	Semi-quant immunoblotting
	C	11m	P	24	500		2	400	Semi-quant immunoblotting
	C	11n	P	25	200		3	100	Semi-quant immunoblotting
	C	11o	P	26			4	3000	Semi-quant immunoblotting		>3000 nm
	C	11p	P	27	600		5	500	Semi-quant immunoblotting
	C	12a	A	17					Semi-quant immunoblotting		DC50 N.D.
	C	12b	A	18	400		-1	200	Semi-quant immunoblotting
	C	12c	A	19	200		0	0	Semi-quant immunoblotting
	C	12d	A	20	300		1	100	Semi-quant immunoblotting
	C	12e	A	21	400		2	200	Semi-quant immunoblotting
	C	12f	A	22	300		3	100	Semi-quant immunoblotting
	C	12g	A	23	500		4	300	Semi-quant immunoblotting
	C	13a	P	31					Semi-quant immunoblotting		>3000 nm
	C	13b	P	30					Semi-quant immunoblotting		>3000 nm
	C	13c	P	33					Semi-quant immunoblotting		>3000 nm
	C	13d	P	34	300				Semi-quant immunoblotting
	C	13e	P	35					Semi-quant immunoblotting		>3000 nm
	C	13f	P	37					Semi-quant immunoblotting		>3000 nm
	C	14a	A	17			-4	3000	Semi-quant immunoblotting		>3000 nm
	C	14b	A	18			-3	3000	Semi-quant immunoblotting		>3000 nm
	C	14c	A	19			-2	3000	Semi-quant immunoblotting		>3000 nm
	C	14d	A	20	300		-1	100	Semi-quant immunoblotting
	C	14e	A	21	200		0	0	Semi-quant immunoblotting
	C	14f	A	22	700		1	500	Semi-quant immunoblotting
	C	15a	A	17			-4	3000	Semi-quant immunoblotting		>3000 nm
	C	15b	A	18			-3	3000	Semi-quant immunoblotting		>3000 nm
	C	15c	A	19			-2	3000	Semi-quant immunoblotting		>3000 nm
	C	15d	A	20	2300		-1	1800	Semi-quant immunoblotting
	C	15e	A	21	500		0	0	Semi-quant immunoblotting
	C	15f	A	22	600		1	100	Semi-quant immunoblotting
https://doi.org/10.1021/acs.jmedchem.9b01530	C	12	A	6	2630	molm-16	-2	2570	Semi-quant immunoblotting	STAT3
	C	13	A	7	260		-1	200	Semi-quant immunoblotting
	C	14	A	8	60		0	0	Semi-quant immunoblotting
	C	15	A	9	90		1	30	Semi-quant immunoblotting
	C	16	A	11	150		3	90	Semi-quant immunoblotting
https://doi.org/10.1021/acs.jmedchem.9b01264	V	17	A	10	10.1	K562	2	1.6	Semi-quant immunoblotting	BCR-ABL
	V	18	A	9	37.9		1	29.4	Semi-quant immunoblotting
	V	19	A	8	8.5		0	0	Semi-quant immunoblotting
	V	20	A	7	17.9		-1	9.4	Semi-quant immunoblotting
	V	21	A	6	34.7		-2	26.2	Semi-quant immunoblotting
	V	22	A	5	40.2		-3	31.7	Semi-quant immunoblotting
	V	23	A	4	611.4		-4	602.9	Semi-quant immunoblotting
https://doi.org/10.1021/acs.jmedchem.9b00871	C	CP-10	P	10	2.1	U251	1	1	Semi-quant immunoblotting	CDK6
	C	CP-5	P	9	1.1		0	0	Semi-quant immunoblotting
	C	CP-6	P	12	24.2		3	23.1	Semi-quant immunoblotting
	C	CP-7	P	15	14.3		6	13.2	Semi-quant immunoblotting
	C	CP-8	P	18	31		9	29.9	Semi-quant immunoblotting
	C	CP-15	P	9	1.6		0	0.5	Semi-quant immunoblotting
	C	CP-13	A	10	5.3		0	3.6	Semi-quant immunoblotting
	C	CP-14	A	11	10.6		1	8.9	Semi-quant immunoblotting
	C	CP-16	A	10	1.7		0	0	Semi-quant immunoblotting
	C	CP-A1	P	10	8.6		0	0	Semi-quant immunoblotting
	C	CP-A2	P	13	129.7		3	121.1	Semi-quant immunoblotting
	C	CP-A3	P	16	271.9		6	263.3	Semi-quant immunoblotting
	C	CP-A4	P	19	145.5		9	136.9	Semi-quant immunoblotting
https://doi.org/10.1021/acs.jmedchem.9b00516	C	12a	A	8	3.41	MM1S	-3	1.77	In-cell ELISA	HDAC6
	C	12d	A	11	1.64		0	0	In-cell ELISA
	C	12i	A	10	2.54		-1	0.9	In-cell ELISA
https://doi.org/10.1021/jacs.8b08008	V	1	P	5	23.2	PC3	-1	20.2	Semi-quant immunoblotting	FAK
	V	2	P	6	7.6		0	4.6	Semi-quant immunoblotting
	V	3	P	6	3		0	0	Semi-quant immunoblotting
	V	4	P	7	4		1	1	Semi-quant immunoblotting
	V	5	P	9	20.8		3	17.8	Semi-quant immunoblotting
	V	6	P	15	48.1		9	45.1	Semi-quant immunoblotting
	V	8	P	7	8.2		1	5.2	Semi-quant immunoblotting
	V	9	P	9	26.7		3	23.7	Semi-quant immunoblotting
https://doi.org/10.1073/pnas.1803662115	C	5	P	9	1487	RAMOS	-9	1485.9	Semi-quant immunoblotting	BTK
	C	6	P	12	36.9		-6	35.8	Semi-quant immunoblotting
	C	7	P	13	21.8		-5	20.7	Semi-quant immunoblotting
	C	8	P	15	4.5		-3	3.4	Semi-quant immunoblotting
	C	9	P	16	5.9		-2	4.8	Semi-quant immunoblotting
	C	10	P	18	1.1		0	0	Semi-quant immunoblotting
	C	11	P	19	9.7		1	8.6	Semi-quant immunoblotting
	C	6	P	12	398.5	THP-1	-6	361.1	Semi-quant immunoblotting
	C	7	P	13	469.9		-5	432.5	Semi-quant immunoblotting
	C	8	P	15	90.5		-3	53.1	Semi-quant immunoblotting
	C	9	P	16	217.7		-2	180.3	Semi-quant immunoblotting
	C	10	P	18	37.4		0	0	Semi-quant immunoblotting
	C	11	P	19	184.1		1	146.7	Semi-quant immunoblotting
https://doi.org/10.1021/acs.jmedchem.7b00635	V	3f	P	12	88	Panc.02.13	-3	76	Semi-quant immunoblotting	TANK-binding Kinase 1
	V	3g	P	13	71		-2	59	Semi-quant immunoblotting
	V	3h	P	14	103		-1	91	Semi-quant immunoblotting
	V	3i	P	15	12		0	0	Semi-quant immunoblotting		Compound chosen in series to match selections made in original SAR study
	V	3j	P	16	95		1	83	Semi-quant immunoblotting
	V	3k	P	17	29		2	17	Semi-quant immunoblotting
	V	3l	P	18	6		3	-6	Semi-quant immunoblotting
	V	3m	P	19	25		4	13	Semi-quant immunoblotting
	V	3n	P	20	34		5	22	Semi-quant immunoblotting
	V	3o	P	21	3		6	-9	Semi-quant immunoblotting
	V	3p	P	29	292		14	280	Semi-quant immunoblotting
https://doi.org/10.1021/acs.jmedchem.6b01912	V	5	P	9	100	HeLa	-6	96	Semi-quant immunoblotting	BRD4 short
	V	6	P	12	8		-3	4	Semi-quant immunoblotting
	V	7	P	15	4		0	0	Semi-quant immunoblotting
	V	8	P	9	126		-3	118	Semi-quant immunoblotting
	V	9	P	12	8		0	0	Semi-quant immunoblotting		Ties in potency were given to those with largest Dmax
	V	10	P	15	8		3	0	Semi-quant immunoblotting
	V	5	P	9	100		-3	97	Semi-quant immunoblotting	BRD4 Long
	V	6	P	12	3		0	0	Semi-quant immunoblotting
	V	7	P	15	10		3	7	Semi-quant immunoblotting
	V	8	P	9	200		-3	175	Semi-quant immunoblotting
	V	9	P	12	25		0	0	Semi-quant immunoblotting
	V	10	P	15	32		3	7	Semi-quant immunoblotting
	V	5	P	9	316		-3	216	Semi-quant immunoblotting	BRD3
	V	6	P	12	100		0	0	Semi-quant immunoblotting
	V	7	P	15	316		3	216	Semi-quant immunoblotting
	V	8	P	9	158		-6	138	Semi-quant immunoblotting
	V	9	P	12	50		-3	30	Semi-quant immunoblotting
	V	10	P	15	20		0	0	Semi-quant immunoblotting
	V	5	P	9	631		-3	591	Semi-quant immunoblotting	BRD2
	V	6	P	12	40		0	0	Semi-quant immunoblotting
	V	7	P	15	200		3	160	Semi-quant immunoblotting
https://doi.org/10.1021/acs.jmedchem.6b01781	C	11a	P	8	490	NCI-H661	-12	290	Semi-quant immunoblotting	BRD4
	C	11b	P	11			-9	3000	Semi-quant immunoblotting		>5000
	C	11c	P	14			-6	3000	Semi-quant immunoblotting		>5000
	C	11d	P	17	450		-3	250	Semi-quant immunoblotting
	C	11e	P	20	200		0	0	Semi-quant immunoblotting
	V	12a	P	10	59		0	0	Semi-quant immunoblotting
	V	12b	P	13	83		3	24	Semi-quant immunoblotting
	V	12c	P	16	240		6	181	Semi-quant immunoblotting
	V	12d	P	19	460		9	401	Semi-quant immunoblotting
	V	12e	P	22	630		12	571	Semi-quant immunoblotting
https://doi.org/10.1016/j.ejmech.2020.112190	V	8	A	8		SR			Semi-quant immunoblotting	ALK	>50
	V	9	A	9	15				Semi-quant immunoblotting
	V	10	A	10					Semi-quant immunoblotting		>50
									Semi-quant immunoblotting
	V	15	A	8	9.1		-3	2.1	Semi-quant immunoblotting
	V	16	A	9	20.9		-2	13.9	Semi-quant immunoblotting
	V	17	A	10	7.2		-1	0.2	Semi-quant immunoblotting
	V	18	A	11	7		0	0	Semi-quant immunoblotting
									Semi-quant immunoblotting
	V	23	A	8	11.4		-2	3.9	Semi-quant immunoblotting
	V	24	A	9	25.1		-1	17.6	Semi-quant immunoblotting
	V	25	A	10	7.5		0	0	Semi-quant immunoblotting
